# Supplementary material for: A pilot systematic genomic comparison of recurrence risks of hepatitis B virus-associated hepatocellular carcinoma with low- and high-degree liver fibrosis
Source: BMC Med. 2017 Dec 7;15:214. doi: 10.1186/s12916-017-0973-7 (PMC5719570; doi:10.1186/s12916-017-0973-7)
Supplement: Supplementary file 4 — Comparison of cirrhotic signatures with other liver cancer signatures in MSigDB. (XLSX 2020 kb) [file 12916_2017_973_MOESM4_ESM.xlsx]

## Sheet: Liver_high_C2.txt
STable2. Comparison of cirrhotic signatures with other liver cancer signatures in MSigDB
Fibrosis Stage	MsigDB Dataset	# of genes	# of common genes	Odd-ratio	FET p-value
Upregulated in high fibrosis group	PATIL_LIVER_CANCER	715	91	3.25429	3.59e-19
	HOSHIDA_LIVER_CANCER_SUBCLASS_S1	234	39	4.33779	1.62e-12
	CHIANG_LIVER_CANCER_SUBCLASS_PROLIFERATION_UP	170	27	4.06196	1.24e-08
	CAIRO_HEPATOBLASTOMA_UP	203	27	3.296	5.18e-07
	WOO_LIVER_CANCER_RECURRENCE_UP	102	17	4.27615	3.05e-06
	ACEVEDO_LIVER_CANCER_UP	923	72	1.8397	4.87e-06
Upregulated in low fibrosis group	HSIAO_LIVER_SPECIFIC_GENES	241	16	30.3266	1.19e-17
	CAIRO_HEPATOBLASTOMA_DN	257	16	28.278	3.31e-17
	CHIANG_LIVER_CANCER_SUBCLASS_PROLIFERATION_DN	174	14	36.2238	1.01e-16
	SHETH_LIVER_CANCER_VS_TXNIP_LOSS_PAM4	254	12	19.8515	1.03e-11
	HOSHIDA_LIVER_CANCER_SUBCLASS_S3	264	10	15.296	5.14e-09
	YAMASHITA_LIVER_CANCER_STEM_CELL_DN	76	6	31.6503	9.37e-08
	LEE_LIVER_CANCER_SURVIVAL_UP	178	7	15.279	9.09e-07
	BOYAULT_LIVER_CANCER_SUBCLASS_G23_DN	10	3	151.904	2.82e-06
	CAIRO_LIVER_DEVELOPMENT_DN	216	7	12.4832	3.29e-06
	WOO_LIVER_CANCER_RECURRENCE_DN	79	5	24.6207	3.52e-06
	SERVITJA_LIVER_HNF1A_TARGETS_DN	154	6	14.9348	6.01e-06
