# Supplementary material for: A pilot systematic genomic comparison of recurrence risks of hepatitis B virus-associated hepatocellular carcinoma with low- and high-degree liver fibrosis
Source: BMC Med. 2017 Dec 7;15:214. doi: 10.1186/s12916-017-0973-7 (PMC5719570; doi:10.1186/s12916-017-0973-7)
Supplement: Supplementary file 23 — Pathogenic somatic mutations biased in tumor recurrence group. (XLSX 10 kb) [file 12916_2017_973_MOESM23_ESM.xlsx]

## Sheet: High_fibrosis_somatic_mutation.
STable13. Pathogenic somatic mutations biased in tumor recurred group
Low liver fibrosis
Chromosome	Coordinate	Gene symbol	Mutation
chr3	4723102	ITPR1	G->GTGA
chr6	56044578	COL21A1	T->C
chr6	90660754	BACH2	G->A
chr8	3265590	CSMD1	C->T
chr9	104433235	GRIN3A	C->T
chr9	115652881	SLC46A2	G->T
chr9	127818276	SCAI	C->T
chr13	33629393	KL	C->T
chr17	45258951	CDC27	A->G
chr17	45258954	CDC27	A->G
chr18	12948134	SEH1L	G->C
High liver fibrosis
Chromosome	Coordinate	Gene symbol	Mutation
chr2	167144995	SCN9A	T->C
chr2	167145142	SCN9A	A->G
chr3	128204951	GATA2	C->T
chr5	170336704	RANBP17	G->A
chr6	16327864	ATXN1	G->GTGC
chr7	27196113	HOXA7	C->T
chr7	77756724	MAGI2	C->T
chr7	128480123	FLNC	C->A
chr9	135073877	NTNG2	C->T
chr14	51446216	TRIM9	T->G
chr14	75276079	YLPM1	C->G
chr15	49304895	SECISBP2L	C->CT
chr15	51294832	AP4E1	G->A
chr16	70161263	PDPR	T->C
chr17	79612659	TSPAN10	AGT->A
chr18	42532693	SETBP1	C->A
chr22	33778028	LARGE	A->G
